# Supplementary material for: Size and shape fine-tuning of SnO2 nanoparticles for highly efficient and stable dye-sensitized solar cells
Source: Royal Society of Chemistry journal article supplement (doi:10.1039/c3ta12279d), 2013-01-01
Supplement: c3ta12279d.pdf [file c3ta12279d.pdf]

## Electronic Supplementary Information

# Size and shape fine-tuning of SnO<sub>2</sub> nanoparticles for highly efficient and stable dye-sensitized solar cells

Ludmila Cojocaru,<sup>a</sup> Céline Olivier,<sup>\*a</sup> Thierry Toupance,<sup>\*a</sup> Elisabeth Sellier,<sup>b</sup> and Lionel Hirsch<sup>c</sup>

<sup>a</sup> Université de Bordeaux, Institut des Sciences Moléculaires, ISM UMR 5255 CNRS, 351 Cours de la Libération, F-33405 Talence Cédex, France. Fax: + 33 5 40006994; Tel: + 33 5 40002523; E-mail: [t.toupance@ism.u-bordeaux1.fr](mailto:t.toupance@ism.u-bordeaux1.fr)

<sup>b</sup> Université de Bordeaux, CREMEM, Avenue des Facultés, bât B8, F-33405 Talence Cédex, France.

<sup>c</sup> Université de Bordeaux, Laboratoire de l'Intégration du Matériau au Système, UMR 5218 CNRS, 16 Avenue Pey-Berland, F-33607 Pessac Cédex, France.

### N<sub>2</sub> sorption measurements

N<sub>2</sub> adsorption-desorption isotherms recorded for scraped off *nano*SnO<sub>2</sub>, *nano*SnO<sub>2</sub>&*octa*SnO<sub>2</sub> and *octa*SnO<sub>2</sub> films after TiCl<sub>4</sub> post-treatment are given in Fig. S1.

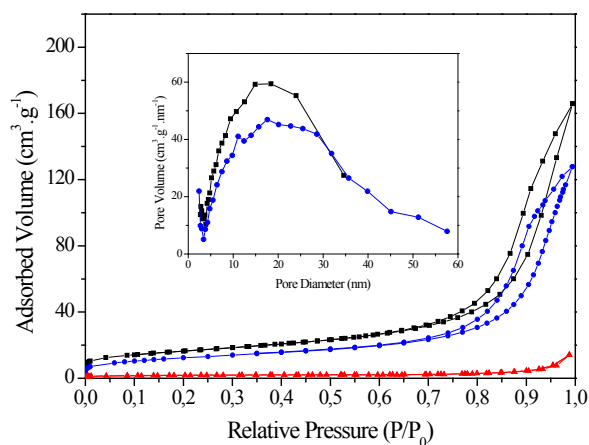

**Fig. S1** N<sub>2</sub> adsorption-desorption isotherms for *nano*SnO<sub>2</sub> (square, black), *nano*SnO<sub>2</sub>&*octa*SnO<sub>2</sub> (circle, blue) and *octa*SnO<sub>2</sub> (up-triangle, red) films after TiCl<sub>4</sub> post-treatment.

### X-ray Photoelectron Spectroscopy

XPS spectra of *nanoSnO<sub>2</sub>* and *nanoSnO<sub>2</sub>\_octaSnO<sub>2</sub>* photoanodes are given in Fig. S2, S3 and S4.

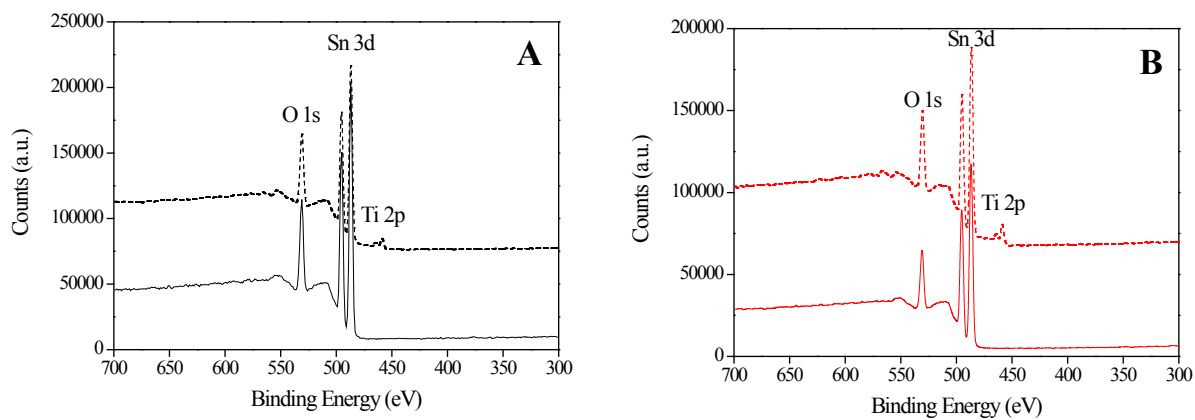

**Fig. S2** XPS survey spectra of *nanoSnO<sub>2</sub>* (A) and *nanoSnO<sub>2</sub>\_octaSnO<sub>2</sub>* (B) photoanodes with (full line) and without  $\text{TiCl}_4$  (dashed line) post-treatment.

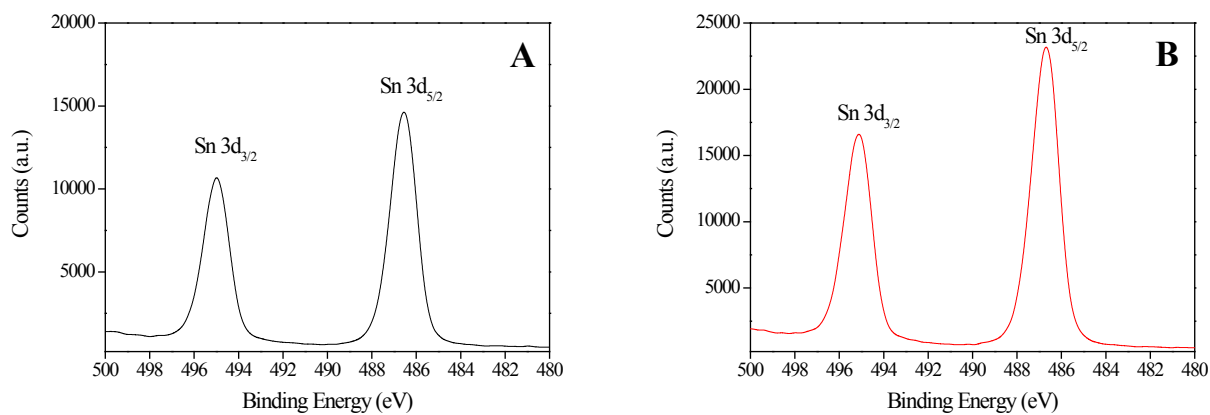

**Fig. S3** XPS Sn3d region of *nanoSnO<sub>2</sub>* (A) and *nanoSnO<sub>2</sub>\_octaSnO<sub>2</sub>* (B) photoanodes without post-treatment.

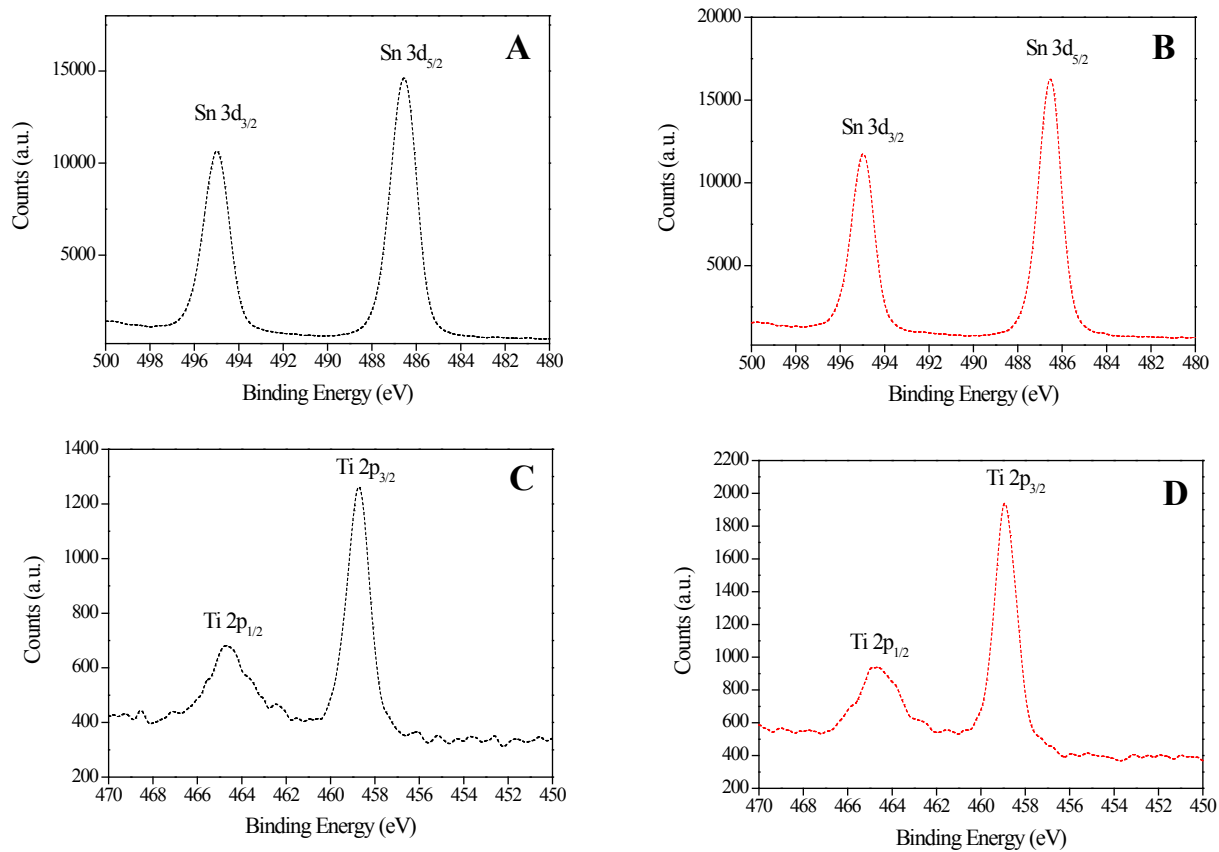

**Fig. S4** XPS Sn3d and Ti2p regions of *nanoSnO<sub>2</sub>* (A, C) and *nanoSnO<sub>2</sub>\_octaSnO<sub>2</sub>* (B, D) photoanodes after TiCl<sub>4</sub> post-treatment.

### ATR-FTIR spectroscopy

The ATR-FTIR spectra of N719-sensitized nanoSnO<sub>2</sub> and octaSnO<sub>2</sub> layers with or without TiCl<sub>4</sub>-treatment are given in Fig. S5.

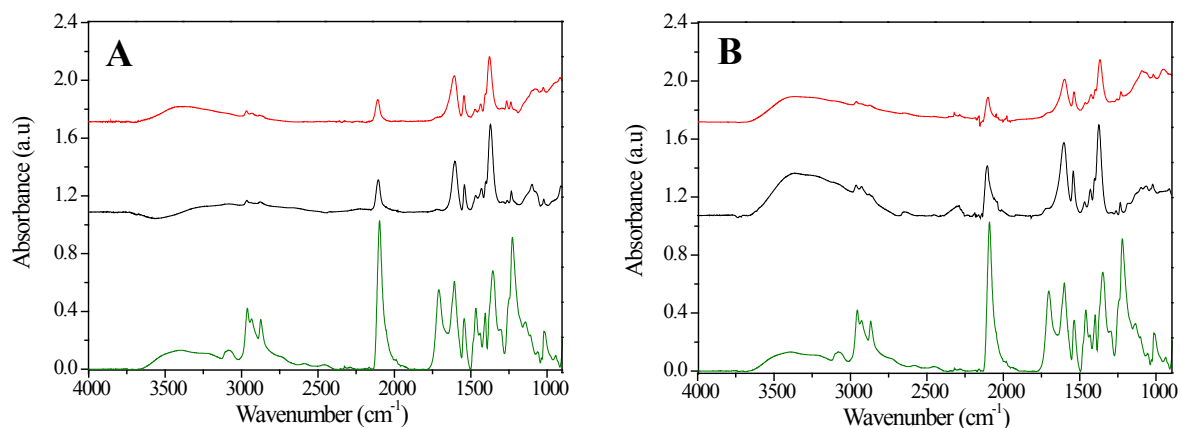

**Fig. S5** ATR-FTIR spectra of N719 dye (powder, green), N719-sensitized nanoSnO<sub>2</sub> (black) and octaSnO<sub>2</sub> (red) layers with **(B)** or without **(A)** TiCl<sub>4</sub> post-treatment.

### UV-visible diffuse reflectance spectroscopy

The UV-visible diffuse reflectance spectra of *nanoSnO<sub>2</sub>*, *nanoSnO<sub>2</sub>&octaSnO<sub>2</sub>* and *nanoSnO<sub>2</sub>\_octaSnO<sub>2</sub>* films were recorded on a Varian Cary 5000 spectrophotometer. They are shown in Fig. S6.

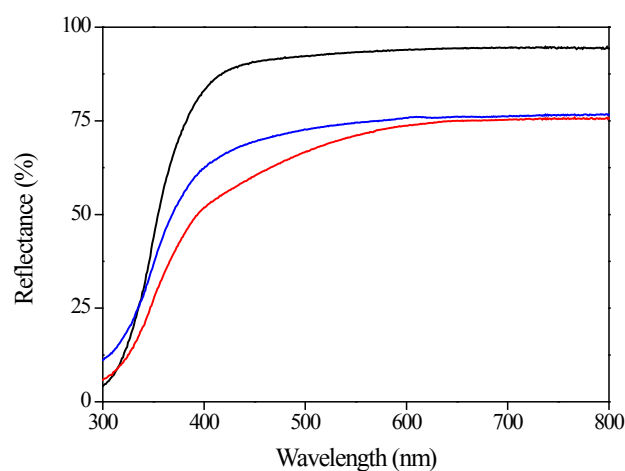

**Fig. S6** UV-visible diffuse reflectance spectra of *nanoSnO<sub>2</sub>* (black), *nanoSnO<sub>2</sub>&octaSnO<sub>2</sub>* (blue) and *nanoSnO<sub>2</sub>\_octaSnO<sub>2</sub>* (red) films without TiCl<sub>4</sub> post-treatment.

### Characterization of SnO<sub>2</sub>-based DSCs

The photovoltaic parameters of the SnO<sub>2</sub>-based DSCs measured just after assembling (within 2 hours) are reported in Table S1.

**Table S1.** Photovoltaic properties of DSCs assembled with different SnO<sub>2</sub> photoanodes just after assembling. Incident power: AM1.5G 100 mW.cm<sup>-2</sup>.

| Photoanode                                                     | TiCl <sub>4</sub> | Th <sup>a</sup><br>(μm) | J <sub>sc</sub><br>(mA.cm <sup>-2</sup> ) | V <sub>oc</sub><br>(mV) | FF<br>(%) | η<br>(%) <sup>c</sup> |
|----------------------------------------------------------------|-------------------|-------------------------|-------------------------------------------|-------------------------|-----------|-----------------------|
| <i>nano</i> SnO <sub>2</sub>                                   | none              | 13                      | 10.3                                      | 440                     | 41        | 1.9                   |
|                                                                | with              | 13                      | 12.9                                      | 510                     | 47        | 3.1                   |
| <i>nano</i> SnO <sub>2</sub> /<br><i>octa</i> SnO <sub>2</sub> | none              | 22                      | 9.4                                       | 390                     | 53        | 1.9                   |
|                                                                | with              | 22                      | 13.9                                      | 460                     | 49        | 3.2                   |
| <i>nano</i> SnO <sub>2</sub> &<br><i>octa</i> SnO <sub>2</sub> | none              | 11                      | 9.4                                       | 430                     | 39        | 1.6                   |
|                                                                | with              | 11                      | 9.5                                       | 510                     | 50        | 2.4                   |
| <i>octa</i> SnO <sub>2</sub>                                   | none              | 8                       | 2.1                                       | 600                     | 42        | 0.5                   |
|                                                                | with              | 8                       | 2.8                                       | 700                     | 34        | 0.7                   |

<sup>a</sup> Th: Film thickness determined from cross-sectional SEM micrographs; uncertainty ± 1 μm. <sup>b</sup> A: Amount of dye chemisorbed; uncertainty ± 5%. <sup>c</sup> measured for at least three different cells; uncertainty ± 0.05 %.
